# Supplementary material for: Improving the scratch resistance of sol–gel metal oxide coatings cured at 250 °C through use of thermogenerated amines
Source: Springer Nature journal article supplement (doi:10.1007/s10971-013-3077-7), 2013-06-13
Supplement: MOESM1 [file 10971_2013_3077_MOESM1_ESM.pdf]

# Improving the Scratch Resistance of Sol-Gel Coatings Through Use of a Novel Low-Temperature Curing Process Involving Thermogenerated Amines

J. Langanke<sup>1</sup>, N. Arfsten<sup>2</sup>, P. Buskens<sup>\*3,4</sup>, R. Habets<sup>2</sup>, J. Klankermayer<sup>\*a</sup>, W. Leitner<sup>a,5</sup>

## 2-Phenyl-2-propanol (3a):

**3a** was synthesised according to F. Galaud, W. D. Lubell, *Biopolymers*, 2005, **80**, 665-674 (Y = 70 %, 2.54 g).

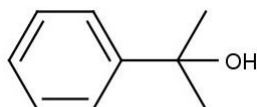

**3a**

<sup>1</sup>H-NMR (300 MHz, CDCl<sub>3</sub>): δ = 7.34 (2H, d, <sup>3</sup>J = 7.6 Hz, ortho-CH), 7.19 (2H, t, <sup>3</sup>J = 7.6 Hz, meta-CH), 7.09 (1H, d, <sup>3</sup>J = 7.6 Hz, para-CH), 2.35 (br s, OH), 1.36 (6H, s, CH<sub>3</sub>) ppm.

<sup>13</sup>C-NMR (75 MHz, CDCl<sub>3</sub>): δ = 149.3 (ipso-C), 128.3 (meta-CH), 126.7 (ortho-CH), 124.6 (para-CH), 72.6 (C), 31.8 (CH<sub>3</sub>) ppm.

## 2-(3,5-Dimethoxyphenyl)propan-2-ol (3b):

**3b** was synthesised according to N.-Y. Shih, P. Mangiaracina, M. J. Green, A. K. Ganguly, *Tetrahedron Lett.*, 1989, **30**, 5563-5566 (Y = 93 %, 4.87 g).

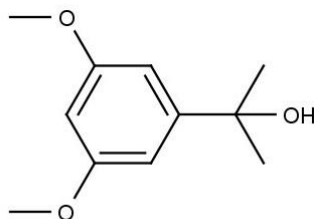

**3b**

<sup>1</sup>H-NMR (300 MHz, CDCl<sub>3</sub>): δ = 6.60 (2H, d, <sup>4</sup>J = 2.2 Hz, ortho-CH), 6.29 (1H, t, <sup>4</sup>J = 2.2 Hz, para-CH), 3.77 (6H, s, OCH<sub>3</sub>), 1.57 (br s, OH), 1.51 (6H, s, CH<sub>3</sub>) ppm.

<sup>13</sup>C-NMR (75 MHz, CDCl<sub>3</sub>): δ = 160.6 (meta-C), 151.9 (ipso-C), 102.8 (ortho-CH), 98.2 (para-CH), 72.4 (C), 55.2 (OCH<sub>3</sub>), 31.5 (CH<sub>3</sub>) ppm.

<sup>1</sup> Institut für Technische und Makromolekulare Chemie, RWTH Aachen University, Worringerweg 1, 52074 Aachen, Germany; Email: klankermayer@itmc.rwth-aachen.de

<sup>2</sup> DSM Ahead B.V., Urmonderbaan 20, 6167 RD Geleen, The Netherlands

<sup>3</sup> TNO, De Rondon 1, 5612 AP Eindhoven, The Netherlands; Email: pascal.buskens@tno.nl

<sup>4</sup> DWI an der RWTH Aachen e.V., Forckenbeckstrasse 50, 52074 Aachen, Germany; Email: buskens@dwi.rwth-aachen.de

<sup>5</sup> Max-Planck-Institut für Kohlenforschung, Kaiser-Wilhelm-Platz 1, 45470 Mülheim an der Ruhr, Germany

### 2-Phenylpropan-2-yl N-cyclohexylcarbamate (5a):

**3a** (1.31 g, 9.60 mmol), isocyanatocyclohexane (**4a**, 1.20 g, 9.60 mmol) and dibutyltin dilaureate (**DBTDL**, 0.075 mL, 95 %, 0.1 mmol) were dissolved in 35 mL dry Et<sub>2</sub>O and brought to reflux for 24 h. After removing all volatiles under reduced pressure, the crude product was purified *via* flash column chromatography (stationary phase: Merck silica gel 60, eluent: DCM). The pure carbamate **5a** (R<sub>f</sub> = 0.49) was obtained in 68 % yield (1.69 g, 6.48 mmol).

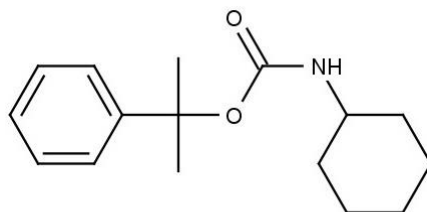

**5a**

<sup>1</sup>H-NMR (300 MHz, CDCl<sub>3</sub>): δ = 7.46-7.20 (5H, m, Ar-H), 4.64 (br s, NH), 3.53-3.33 (1H, m, CH), 2.12-0.99 (10H, m, CH<sub>2</sub>), 1.76 (6H, s, CH<sub>3</sub>) ppm.

<sup>13</sup>C-NMR (75 MHz, CDCl<sub>3</sub>): δ = 154.6 (C=O), 146.8 (ipso-C), 128.2 (meta-CH), 126.8 (ortho-CH), 124.3 (para-CH), 80.5 (C), 49.6 (CH), 33.6 (CH<sub>2</sub>), 29.1 (CH<sub>3</sub>), 25.6 (CH<sub>2</sub>), 24.9 (CH<sub>2</sub>) ppm.

IR: ν<sub>max</sub> = 3296 (m, N-H), 1676 (s, C=O) cm<sup>-1</sup>.

MS (EI, 70 eV): 261.3 (M<sup>+</sup>), 119.1 m/z.

DSC (40-300 °C, 10 °C · min<sup>-1</sup>): T<sub>m</sub> = 113.3 °C, T<sub>d</sub> = 168.3 °C.

### 2-Phenylpropan-2-yl N-phenylcarbamate (5b):

**3a** (1.06 g, 7.81 mmol), phenylisocyanate (**4b**, 0.93 g, 7.81 mmol) and **DBTDL** (0.05 mL, 95 %, 0.08 mmol) were dissolved in 50 mL dry Et<sub>2</sub>O and brought to reflux for 21 h. After removing all volatiles under reduced pressure, the crude product was purified *via* flash column chromatography (stationary phase: Merck silica gel 60, eluent: DCM). The pure carbamate **5b** (R<sub>f</sub> = 0.90) was obtained in 32 % yield (0.65 g, 2.53 mmol).

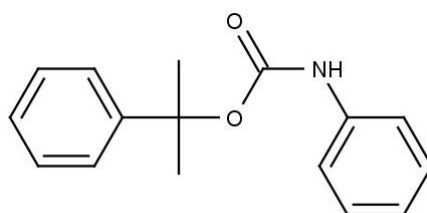

**5b**

<sup>1</sup>H-NMR (300 MHz, CDCl<sub>3</sub>): δ = 7.36-7.10 (9H, m, Ar-H), 6.91 (1H, t, <sup>3</sup>J = 7.4 Hz, Ar-H), 6.62 (br s, NH), 1.75 (6H, s, CH<sub>3</sub>) ppm.

<sup>13</sup>C-NMR (75 MHz, CDCl<sub>3</sub>): δ = 152.1 (C=O), 146.0 (ipso-C), 138.2 (ipso-C), 129.0 (Ar-CH), 128.4 (Ar-CH), 127.1 (Ar-CH), 124.4 (Ar-CH), 123.2 (Ar-CH), 118.6 (Ar-CH), 81.8 (C), 29.0 (CH<sub>3</sub>) ppm.

IR:  $\nu_{\max}$  = 3313 (m, N-H), 1699 (s, C=O)  $\text{cm}^{-1}$ .

MS (EI, 70 eV): 255.2 ( $\text{M}^+$ ), 119.1, 93.0 m/z.

DSC (40-300  $^{\circ}\text{C}$ , 10  $^{\circ}\text{C} \cdot \text{min}^{-1}$ ):  $T_{\text{m}}$  = 106.1  $^{\circ}\text{C}$ ,  $T_{\text{d}}$  = 161.9  $^{\circ}\text{C}$ .

2-Phenylpropan-2-yl N-(4-nitrophenyl)carbamate (**5c**):

**3a** (0.95 g, 7.01 mmol), 4-nitrophenylisocyanate (**4c**, 1.15 g, 7.01 mmol) and **DBTDL** (0.075 mL, 95 %, 0.12 mmol) were dissolved in 40 mL dry  $\text{Et}_2\text{O}$  and brought to reflux for 66 h. After removing all volatiles under reduced pressure, the crude product was purified *via* flash column chromatography (stationary phase: Merck silica gel 60, eluent: DCM). The pure carbamate **5c** ( $R_{\text{f}}$  = 0.57) was obtained in 86 % yield (1.81 g, 6.02 mmol).

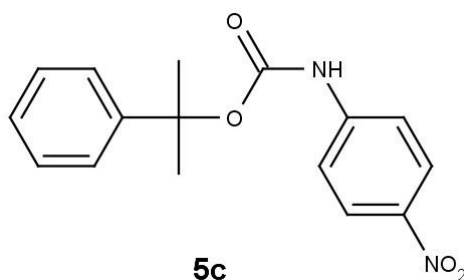

$^1\text{H-NMR}$  (300 MHz,  $\text{CDCl}_3$ ):  $\delta_{\text{H}}$  = 8.06 (2H, m, Ar-H), 7.42-7.17 (7H, m, Ar-H), 7.03 (br s, NH), 1.78 (6H, s,  $\text{CH}_3$ ) ppm.

$^{13}\text{C-NMR}$  (75 MHz,  $\text{CDCl}_3$ ):  $\delta_{\text{C}}$  = 151.3 (C=O), 145.2 (ipso-C), 144.3 (para-C), 142.8 (ipso-C), 128.5 (meta-CH), 127.5 (ortho-CH), 125.2 (para-CH), 124.3 (meta-CH), 117.6 (ortho-CH), 80.1 (C), 28.9 ( $\text{CH}_3$ ) ppm.

DSC (40-300  $^{\circ}\text{C}$ , 10  $^{\circ}\text{C} \cdot \text{min}^{-1}$ ):  $T_{\text{m}}$  = 147.6  $^{\circ}\text{C}$ ,  $T_{\text{d}}$  = 155.5  $^{\circ}\text{C}$ .

2-Phenylpropan-2-yl N-(4-methoxyphenyl)carbamate (**5d**):

**3a** (1.16 g, 8.52 mmol), 4-methoxyphenylisocyanate (**4d**, 1.27 g, 8.52 mmol) and **DBTDL** (0.075 mL, 95 %, 0.12 mmol) were dissolved in 50 mL dry  $\text{Et}_2\text{O}$  and brought to reflux for 66 h. After removing all volatiles under reduced pressure, the crude product was purified *via* flash column chromatography (stationary phase: Merck silica gel 60, eluent: DCM). The pure carbamate **5d** ( $R_{\text{f}}$  = 0.54) was obtained in 79 % yield (1.85 g, 6.49 mmol).

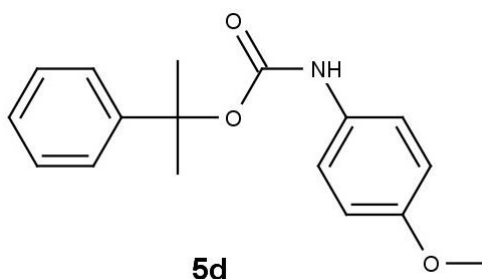

$^1\text{H-NMR}$  (300 MHz,  $\text{CDCl}_3$ ):  $\delta_{\text{H}}$  = 7.48-7.23 (7H, m, Ar-H), 6.84 (2H, d,  $^3J$  = 8.8 Hz, Ar-H), 6.56 (br s, NH), 3.79 (3H, s,  $\text{OCH}_3$ ), 1.86 (6H, s,  $\text{CH}_3$ ) ppm.

$^{13}\text{C}$ -NMR (75 MHz,  $\text{CDCl}_3$ ):  $\delta_{\square}$  = 155.8 (para-C), 152.4 (C=O), 146.1 (ipso-C), 131.4 (ipso-C), 128.4 (meta-CH), 127.1 (ortho-CH), 124.4 (para-CH), 120.4 (ortho-CH), 114.3 (meta-CH), 81.6 (C), 55.6 ( $\text{OCH}_3$ ) 29.1 ( $\text{CH}_3$ ) ppm.

DSC (40-300  $^{\circ}\text{C}$ , 10  $^{\circ}\text{C} \cdot \text{min}^{-1}$ ):  $T_m$  = 101.5  $^{\circ}\text{C}$ ,  $T_d$  = 178.8  $^{\circ}\text{C}$ .

#### 2-Phenylpropan-2-yl N-(naphthalen-1-yl)carbamate (5e):

**3a** (1.39 g, 10.20 mmol), 2-naphthylisocyanate (**4e**, 1.72 g, 10.20 mmol) and **DBTDL** (0.05 mL, 95 %, 0.08 mmol) were dissolved in 50 mL dry  $\text{Et}_2\text{O}$  and brought to reflux for 21 h. After removing all volatiles under reduced pressure, the crude product was purified *via* flash column chromatography (stationary phase: Merck silica gel 60, eluent: DCM). The pure carbamate **5e** ( $R_f$  = 0.96) was obtained in 45 % yield (1.40 g, 4.58 mmol).

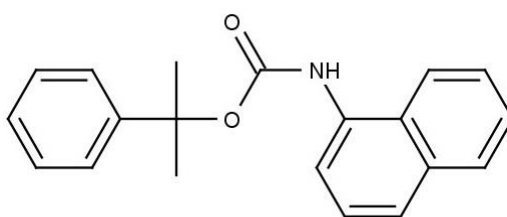

**5e**

$^1\text{H}$ -NMR (300 MHz,  $\text{CDCl}_3$ ):  $\delta_{\square}$  = 7.84-7.69 (3H, m, Naph-H), 7.56-7.12 (9H, m, Naph-H + Ar-H), 6.93 (br s, NH), 1.80 (6H, s,  $\text{CH}_3$ ) ppm.

$^{13}\text{C}$ -NMR (75 MHz,  $\text{CDCl}_3$ ):  $\delta_{\square}$  = 152.9 (C=O), 146.0 (ipso-Ar-C), 134.1, 132.8, 128.8, 128.4, 128.3, 127.1, 126.5, 126.1, 125.9, 125.9, 124.6, 124.4, 120.4, 82.0 (C), 29.1 ( $\text{CH}_3$ ) ppm.

IR:  $\nu_{\text{max}}$  = 3247 (m, N-H), 1689 (s, C=O)  $\text{cm}^{-1}$ .

MS (EI, 70 eV): 305.3 ( $\text{M}^+$ ), 143.1, 119.1 m/z.

DSC (40-300  $^{\circ}\text{C}$ , 10  $^{\circ}\text{C} \cdot \text{min}^{-1}$ ):  $T_m$  = 135.7  $^{\circ}\text{C}$ ,  $T_d$  = 174.1  $^{\circ}\text{C}$ .

#### 2-Phenylpropan-2-yl N-[6-((2-phenylpropan-2-yl)oxy)carbonyl]amino]hexyl]carbamate (5f):

**3a** (1.64 g, 12.04 mmol), 1,6-diisocyanatohexane (**4f**, 1.01 g, 6.02 mmol) and **DBTDL** (0.1 mL, 95 %, 0.17 mmol) were dissolved in 50 mL dry  $\text{Et}_2\text{O}$  and brought to reflux for 66 h. After removing all volatiles under reduced pressure, the crude product was washed with a few mL *n*-hexane and recrystallised from a DCM/*n*-pentane (1:1) mixture. The dry and pure carbamate **5f** was obtained in 65 % yield (1.72 g, 3.91 mmol).

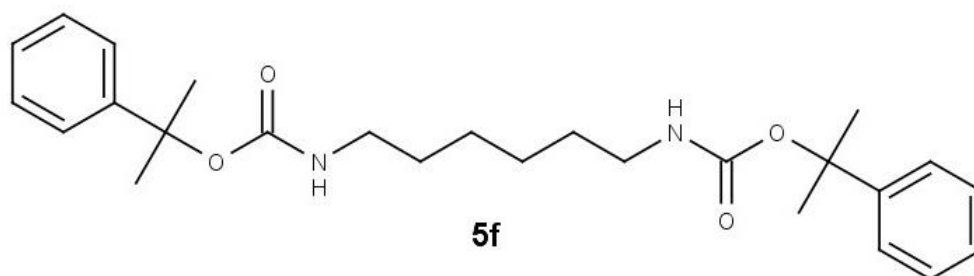

$^1\text{H-NMR}$  (300 MHz,  $\text{CDCl}_3$ ):  $\delta$  = 7.33-7.09 (10H, m, Ar-H), 4.70 (2H, br s, NH), 3.04-2.90 (4H, m, N- $\text{CH}_2$ -), 1.69 (12H, s,  $\text{CH}_3$ ), 1.40-1.26 (4H, m, N $\text{CH}_2$ - $\text{CH}_2$ -), 1.25-1.12 (4H, m, N( $\text{CH}_2$ ) $_2$ - $\text{CH}_2$ -) ppm.

$^{13}\text{C-NMR}$  (75 MHz,  $\text{CDCl}_3$ ):  $\delta$  = 155.3 (C=O), 149.3 (ipso-C), 127.5 (meta-CH), 103.1 (ortho-CH), 98.2 (para-CH), 80.4 (C), 55.3 (N- $\text{CH}_2$ -), 29.1 ( $\text{CH}_3$ ), 21.0 (N $\text{CH}_2$ - $\text{CH}_2$ -), 14.3 (N( $\text{CH}_2$ ) $_2$ - $\text{CH}_2$ -) ppm.

DSC (40-300 °C, 10 °C · min $^{-1}$ ):  $T_m$  = 178.3 °C,  $T_d$  = 212.8 °C.

2-(3,5-Dimethoxyphenyl)propan-2-yl N-cyclohexylcarbamate (**6a**):

**3b** (1.14 g, 5.83 mmol) and 0.02 g fresh Li wire ( $\approx$  50 mol%) were added to 10 mL  $\text{Et}_2\text{O}$  and refluxed for 0.5 h. After the slow addition of **4a** (0.73 g, 5.83 mmol), the resulting mixture was brought to reflux for additional 3 h. After removing all volatiles under reduced pressure, the crude product was purified *via* flash column chromatography (stationary phase: Merck silica gel 60, eluent: *n*-hexane/ethylacetate (85:15)). The pure carbamate **6a** ( $R_f$  = 0.45) was obtained in 53 % yield (1.00 g, 3.10 mmol).

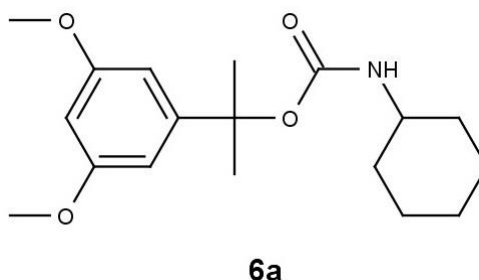

$^1\text{H-NMR}$  (300 MHz,  $\text{CDCl}_3$ ):  $\delta$  = 6.44 (2H, d,  $4J$  = 2.2 Hz, ortho-CH), 6.27 (1H, t,  $4J$  = 2.2 Hz, para-CH), 4.53 (br s, NH), 3.71 (6H, s,  $\text{OCH}_3$ ), 3.41-3.25 (1H, m, CH), 2.00-0.94 (16H, m,  $\text{CH}_3$  +  $\text{CH}_2$ ) ppm.

$^{13}\text{C-NMR}$  (75 MHz,  $\text{CDCl}_3$ ):  $\delta$  = 160.7 (meta-C), 154.4 (C=O), 149.5 (ipso-C), 102.9 (ortho-CH), 98.3 (para-CH), 80.4 (C), 55.3 ( $\text{OCH}_3$ ), 49.6 (CH), 33.6 ( $\text{CH}_2$ ), 29.2 ( $\text{CH}_3$ ), 25.6 ( $\text{CH}_2$ ), 24.9 ( $\text{CH}_2$ ) ppm.

IR:  $\nu_{\text{max}}$  = 3351 (m, N-H), 2854 (m,  $\text{OCH}_3$ ), 1708 (s, C=O)  $\text{cm}^{-1}$ .

MS (EI, 70 eV): 321.3 ( $\text{M}^+$ ), 196.2, 178.2, 99.1 m/z.

DSC (40-300 °C, 10 °C · min $^{-1}$ ):  $T_m$  = 89.8 °C,  $T_d$  = 212.1 °C.

2-(3,5-Dimethoxyphenyl)propan-2-yl N-phenylcarbamate (**6b**):

**3b** (0.79 g, 4.03 mmol), **4b** (0.46 g, 3.83 mmol) and **DBTDL** (0.05 mL, 95 %, 0.08 mmol) were dissolved in 10 mL dry Et<sub>2</sub>O and brought to reflux for 5 h. After removing all volatiles under reduced pressure, the crude product was purified *via* flash column chromatography (stationary phase: Merck silica gel 60, eluent: DCM). The pure carbamate **6b** (R<sub>f</sub> = 0.40) was obtained in 44 % yield (0.56 g, 1.78 mmol).

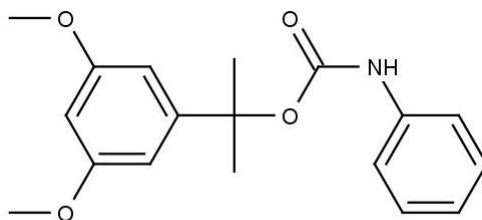

**6b**

<sup>1</sup>H-NMR (300 MHz, CDCl<sub>3</sub>): δ = 7.27 (2H, d, <sup>3</sup>J = 7.5 Hz, ortho-CH), 7.18 (2H, t, <sup>3</sup>J = 7.5 Hz), 6.94 (1H, t, <sup>3</sup>J = 7.5 Hz, para-CH), 6.58 (br s, NH), 6.49 (2H, d, <sup>4</sup>J = 2.2 Hz, ortho-CH), 6.28 (1H, t, <sup>4</sup>J = 2.2 Hz, para-CH), 3.71 (6H, s, OCH<sub>3</sub>), 1.73 (6H, s, CH<sub>3</sub>) ppm.

<sup>13</sup>C-NMR (75 MHz, CDCl<sub>3</sub>): δ = 160.8 (meta-C), 151.9 (C=O), 148.7 (ipso-C), 138.1 (ipso-C), 129.2 (meta-CH), 123.3 (para-CH), 118.5 (ortho-CH), 103.2 (ortho-CH), 98.3 (meta-CH), 81.7 (C), 55.4 (OCH<sub>3</sub>), 29.0 (CH<sub>3</sub>) ppm.

MS (EI, 70 eV): 315.2 (M<sup>+</sup>), 271.2, 178.1, 93.0 m/z.

DSC (40-300 °C, 10 °C · min<sup>-1</sup>): T<sub>m</sub> = 136.3 °C, T<sub>d</sub> = 177.4 °C.

2-(3,5-Dimethoxyphenyl)propan-2-yl N-(4-nitrophenyl)carbamate (**6c**):

**3b** (0.55 g, 2.80 mmol), **4c** (0.46 g, 2.80 mmol) and **DBTDL** (0.1 mL, 95 %, 0.17 mmol) were dissolved in 40 mL dry Et<sub>2</sub>O, brought to reflux for 66 h and, again, stirred for additional 48 h. After removing all volatiles under reduced pressure, the crude product was purified *via* flash column chromatography (stationary phase: Merck silica gel 60, eluent: DCM). The pure carbamate **6c** (R<sub>f</sub> = 0.88) was obtained in 88 % yield (0.88 g, 2.45 mmol).

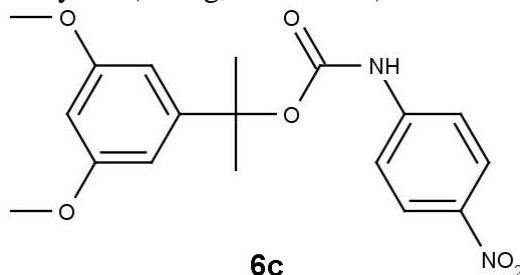

**6c**

<sup>1</sup>H-NMR (300 MHz, CDCl<sub>3</sub>): δ = 8.11-8.05 (2H, m, Ar-H), 7.46-7.39 (2H, m, Ar-H), 6.93 (br s, NH), 6.47 (2H, d, <sup>4</sup>J = 2.2 Hz, ortho-CH), 6.31 (1H, t, <sup>4</sup>J = 2.2 Hz, para-CH), 3.72 (6H, OCH<sub>3</sub>), 1.75 (6H, s, CH<sub>3</sub>) ppm.

<sup>13</sup>C-NMR (75 MHz, CDCl<sub>3</sub>): δ = 160.9 (meta-C), 151.3 (C=O), 148.0 (ipso-C), 144.3 (para-C), 142.9 (ipso-C), 125.3 (meta-CH), 117.7 (ortho-CH), 103.3 (ortho-CH), 98.3 (para-CH), 83.0 (C), 55.3 (OCH<sub>3</sub>), 28.9 (CH<sub>3</sub>) ppm.

DSC (40-300 °C, 10 °C · min<sup>-1</sup>): T<sub>m</sub> = 116.9 °C, T<sub>d</sub> = 143.8 °C.

2-(3,5-Dimethoxyphenyl)propan-2-yl N-(4-methoxyphenyl)carbamate (**6d**):

**3b** (0.87 g, 4.42 mmol), **4d** (0.66 g, 4.42 mmol) and **DBTDL** (0.075 mL, 95 %, 0.12 mmol) were dissolved in 40 mL dry Et<sub>2</sub>O and brought to reflux for 66 h. After removing all volatiles under reduced pressure, the crude product was purified *via* flash column chromatography (stationary phase: Merck silica gel 60, eluent: DCM). The pure carbamate **6d** was obtained in 54 % yield (0.82 g, 2.37 mmol).

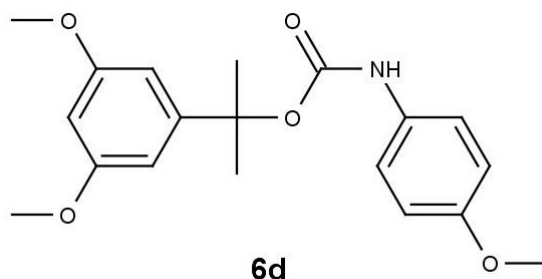

<sup>1</sup>H-NMR (300 MHz, CDCl<sub>3</sub>): δ = 7.24-7.13 (2H, m, ortho-CH), 6.82-6.69 (2H, m, meta-CH), 6.44 (2H, d, <sup>4</sup>J = 2.2 Hz, ortho-CH), 6.27 (1H, t, <sup>4</sup>J = 2.2 Hz, para-CH), 4.14 (br s, NH), 3.71 (6H, s, OCH<sub>3</sub>), 3.69 (3H, s, OCH<sub>3</sub>), 1.72 (6H, s, CH<sub>3</sub>) ppm.

<sup>13</sup>C-NMR (75 MHz, CDCl<sub>3</sub>): δ = 160.7 (meta-C), 157.6 (para-C), 155.8 (C=O), 148.8 (ipso-C), 131.2 (ipso-C), 120.5 (ortho-CH), 103.1 (ortho-CH), 98.3 (para-CH), 81.4 (C), 55.5 (OCH<sub>3</sub>), 55.3 (OCH<sub>3</sub>), 28.9 (CH<sub>3</sub>) ppm.

DSC (40-300 °C, 10 °C · min<sup>-1</sup>): T<sub>m</sub> = 102.2 °C, T<sub>d</sub> = 185.9 °C.

2-(3,5-Dimethoxyphenyl)propan-2-yl N-(naphthalen-1-yl)carbamate (**6e**):

**3b** (2.05 g, 10.45 mmol), **4e** (1.77 g, 10.45 mmol) and **DBTDL** (0.075 mL, 95 %, 0.1 mmol) were dissolved in 20 mL dry Et<sub>2</sub>O and brought to reflux for 6 h. After removing all volatiles under reduced pressure, the crude product was purified *via* flash column chromatography (stationary phase: Merck silica gel 60, eluent: DCM). The pure carbamate **5e** (R<sub>f</sub> = 0.46) was obtained in 37 % yield (1.43 g, 3.91 mmol).

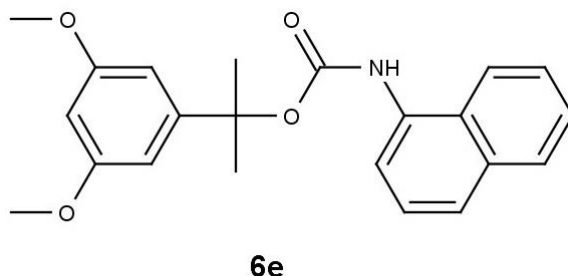

<sup>1</sup>H-NMR (300 MHz, CDCl<sub>3</sub>): δ = 7.86-7.69 (3H, m, Naph-H), 7.58-7.28 (4H, m, Naph-H), 6.92 (br s, NH), 6.51 (2H, d, <sup>4</sup>J = 2.0 Hz, ortho-Ar-CH), 6.29 (1H, t, <sup>4</sup>J = 2.0 Hz, para-Ar-CH), 3.69 (6H, s, OCH<sub>3</sub>), 1.77 (6H, s, CH<sub>3</sub>) ppm.

$^{13}\text{C}$ -NMR (75 MHz,  $\text{CDCl}_3$ ):  $\delta$  = 160.8 (meta-Ar-C), 154.1 (C=O), 152.8 (ipso-Ar-C), 148.7 (ipso-Naph-C), 134.1, 132.7, 128.8, 126.1, 125.9, 125.8, 124.7, 120.4, 109.8, 103.1, 98.4, 82.0 (C), 55.3 ( $\text{OCH}_3$ ), 29.0 ( $\text{CH}_3$ ) ppm.

IR:  $\nu_{\text{max}}$  = 3344 (m, N-H), 2838 (m,  $\text{OCH}_3$ ), 1716 (s, C=O)  $\text{cm}^{-1}$ .

MS (EI, 70 eV): 365.3.3 ( $\text{M}^+$ ), 321.3, 178.2, 143.1 m/z.

DSC (40-300  $^\circ\text{C}$ , 10  $^\circ\text{C} \cdot \text{min}^{-1}$ ):  $T_m$  = 104.5  $^\circ\text{C}$ ,  $T_d$  = 185.1  $^\circ\text{C}$ .

2-(3,5-Dimethoxyphenyl)propan-2-yl N-{6-[(2-(3,5-dimethoxyphenyl)propan-2-yl)oxy]hexyl}carbamate (6f):

**3b** (2.75 g, 14.02 mmol), **4f** (1.18 g, 7.04 mmol) and **DBTDL** (0.1 mL, 95 %, 0.12 mmol) were dissolved in 60 mL dry  $\text{Et}_2\text{O}$  and brought to reflux for 70 h. After removing all volatiles under reduced pressure, the crude product was washed with a few mL *n*-hexane and recrystallised from a DCM/*n*-pentane (1:1) mixture. The dry and pure carbamate **6f** was obtained in 52 % yield (1.97 g, 3.52 mmol).

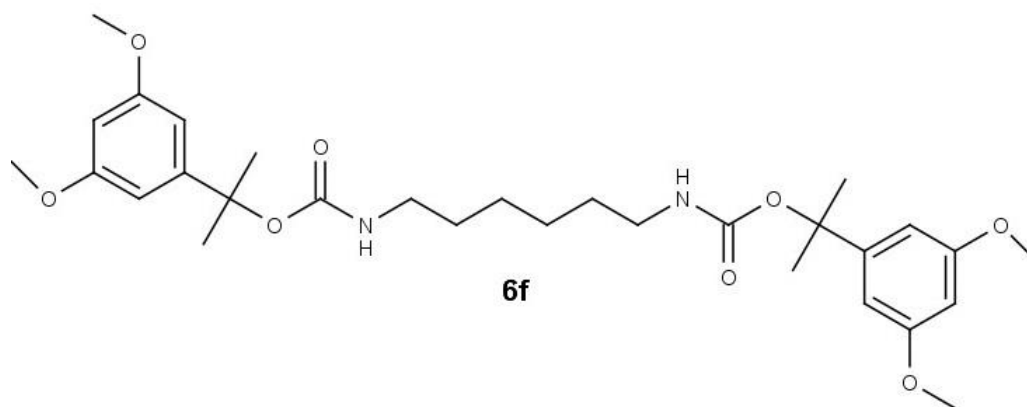

$^1\text{H}$ -NMR (300 MHz,  $\text{CDCl}_3$ ):  $\delta$  = 7.33-7.09 (6H, m, Ar-H), 4.70 (2H, br s, NH), 3.71 (12H, s,  $\text{OCH}_3$ ), 3.04-2.90 (4H, m, N- $\text{CH}_2$ -), 1.69 (12H, s,  $\text{CH}_3$ ), 1.40-1.26 (4H, m, N $\text{CH}_2$ - $\text{CH}_2$ -), 1.25-1.12 (4H, m, N( $\text{CH}_2$ ) $_2$ - $\text{CH}_2$ -) ppm.

$^{13}\text{C}$ -NMR (75 MHz,  $\text{CDCl}_3$ ):  $\delta$  = 160.7 (meta-C), 155.3 (C=O), 149.3 (ipso-C), 103.1 (ortho-CH), 98.2 (para-CH), 80.4 (C), 60.4 ( $\text{OCH}_3$ ), 55.3 (N- $\text{CH}_2$ -), 29.1 ( $\text{CH}_3$ ), 21.0 (N $\text{CH}_2$ - $\text{CH}_2$ -), 14.3 (N( $\text{CH}_2$ ) $_2$ - $\text{CH}_2$ -) ppm.

DSC (40-300  $^\circ\text{C}$ , 10  $^\circ\text{C} \cdot \text{min}^{-1}$ ):  $T_m$  = 185.1  $^\circ\text{C}$ ,  $T_d$  = 227.6  $^\circ\text{C}$ .

Phenyl N-phenylcarbamate (7):

Phenol (1.11 g, 11.76 mmol), **4b** (1.40 g, 11.76 mmol) and **DBTDL** (0.075 mL, 95 %, 0.12 mmol) were dissolved in 30 mL dry  $\text{Et}_2\text{O}$ , stirred for 12 h at room temperature, brought to reflux for 10 h and, again, stirred for additional 12 h at room temperature. After removing all volatiles under reduced pressure, the crude product was purified *via* flash column chromatography (stationary phase: Merck silica gel 60, eluent: DCM). The pure carbamate **7** was obtained in 90 % yield (2.25 g, 10.57 mmol).



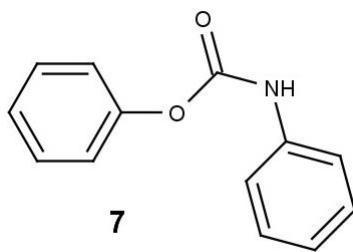

$^1\text{H-NMR}$  (300 MHz,  $\text{CDCl}_3$ ):  $\delta = 7.62\text{-}6.99$  (11H, m, Ar-H + NH) ppm.

$^{13}\text{C-NMR}$  (75 MHz,  $\text{CDCl}_3$ ):  $\delta = 151.9$  (C=O), 150.6 (ipso-C), 137.5 (ipso-C), 129.5 (Ar-CH), 129.2 (Ar-CH), 125.8 (Ar-CH), 124.0 (Ar-CH), 121.8 (Ar-CH), 118.9 (Ar-CH) ppm.

DSC (40-300  $^\circ\text{C}$ , 10  $^\circ\text{C} \cdot \text{min}^{-1}$ ):  $T_m = 126.2$   $^\circ\text{C}$ ,  $T_d = 183.1$   $^\circ\text{C}$ .
